# Supplementary material
Source: PubMed Central journal article supplement (PMC2154470)
Supplement: supp_0710156104_10156Table1.pdf [file supp_0710156104_10156Table1.pdf]

Table 1: Antibodies Employed

| Protein/Antigen                            | Source           | Dilution    | Host |
|--------------------------------------------|------------------|-------------|------|
| $\beta$ gal                                | Cappel           | 1 to 100000 | rb   |
| BrdU/CldU                                  | Accurate         | 1 to 100    | rt   |
| BrdU/IdU                                   | Becton Dickenson | 1 to 100    | ms   |
| Activated caspase 3                        | Cell Signaling   | 1 to 500    | rb   |
| Cleaved Notch1                             | Cell Signaling   | 1 to 100    | rb   |
| Cre                                        | Babco            | 1 to 100    | ms   |
| Dcx                                        | Chemicon         | 1 to 1000   | gp   |
| Dcx                                        | Santa Cruz       | 1 to 500    | gt   |
| Dll-1                                      | Santa Cruz       | 1 to 100    | rb   |
| Dll-1                                      | Santa Cruz       | 1 to 100    | gt   |
| EGFP                                       | Abcam            | 1 to 1000   | ck   |
| EGFP                                       | Abcam            | 1 to 1000   | gt   |
| Egfr                                       | Upstate          | 1 to 75     | sh   |
| Fbxw7                                      | Abcam            | 1 to 1000   | rb   |
| Gfap                                       | Advanced Immuno  | 1 to 1000   | gp   |
| Gfap                                       | Sigma            | 1 to 500    | ms   |
| Gfap                                       | Dako             | 1 to 500    | rb   |
| Hes1                                       | Santa Cruz       | 1 to 100    | gt   |
| Jag1                                       | Santa Cruz       | 1 to 100    | gt   |
| Ki67 (Mki67 clone Tec3)                    | Dako             | 1 to 100    | rt   |
| Ascl1 (Mash1)                              | BD Pharmingen    | 1 to 100    | ms   |
| NECD                                       | Santa Cruz       | 1 to 100    | rb   |
| Nestin (Nes clone Rat401)                  | DSHB             | 1 to 75     | ms   |
| NeuN                                       | Chemicon         | 1 to 1000   | ms   |
| NeuroD (Neurod1)                           | Santa Cruz       | 1 to 1000   | gt   |
| Ngn1 (Neurog1)                             | J. Johnson       | 1 to 1000   | rb   |
| Ngn2 (Neurog2)                             | D. Anderson      | 1 to 20     | ms   |
| NICD                                       | Upstate          | 1 to 100    | rb   |
| NICD                                       | A. Israel        | 1 to 1000   | rb   |
| NICD                                       | Santa Cruz       | 1 to 100    | rb   |
| Notch2                                     | DSHB             | 1 to 2      | ms   |
| Notch2                                     | Santa Cruz       | 1 to 100    | gt   |
| Notch2                                     | Santa Cruz       | 1 to 100    | rb   |
| Numb                                       | YN Jan           | 1 to 1000   | rb   |
| Numb                                       | Abcam            | 1 to 100    | gt   |
| Numblike                                   | Proteintech      | 1 to 100    | rb   |
| p27Kip1 (Cdkn1b)                           | BD Pharmingen    | 1 to 100    | ms   |
| Pax6                                       | DSHB             | 1 to 20     | ms   |
| Pax6                                       | Chemicon         | 1 to 2000   | rb   |
| Psen1 (Presenilin-1)                       | Chemicon         | 1 to 100    | ms   |
| Rbpsuh                                     | CeMines          | 1 to 100    | rb   |
| Ribonucleotide Reductase M1 Subunit (Rrm1) | Chemicon         | 1 to 1000   | ms   |
| Sox2                                       | Santa Cruz       | 1 to 500    | gt   |
| Sox2                                       | Chemicon         | 1 to 500    | rb   |
| Tbr1                                       | Chemicon         | 1 to 1000   | rb   |
| Tbr2 (Eomes)                               | Chemicon         | 1 to 50000  | rb   |
| TuJ1 (Class III $\beta$ -tubulin)          | Babco            | 1 to 500    | ms   |
